# Supplementary material
Source: publisher site journal article supplement (https://www.dovepress.com/article/606643)
Supplement: Supplementary file 1 [file 606643%20Supplementary%20Material.docx]

Table S1 Raw Baseline Characteristics of the Training Set

|  | **All patients** | **Alive** | **Dead** | **P** |
| --- | --- | --- | --- | --- |
|  | N=287 | N=244 | N=43 |  |
| Age | 57.00 (48.00,67.00) | 56.00 (48.00,65.00) | 69.00 (57.50,76.50) | <0.001 |
| First gcs | 14.00 (9.00,15.00) | 14.00 (9.00,15.00) | 8.00 (4.00,11.50) | <0.001 |
| Cl | 103.00 (100.00,105.00) | 103.00 (100.00,105.00) | 103.00 (101.00,104.00) | 0.988 |
| Ca | 2.24 (2.15,2.31) | 2.24 (2.17,2.31) | 2.21 (2.13,2.35) | 0.973 |
| BUN | 4.50 (3.40,5.90) | 4.50 (3.42,5.70) | 4.90 (3.40,6.90) | 0.176 |
| K | 3.64 (3.33,3.90) | 3.63 (3.33,3.91) | 3.67 (3.32,3.80) | 0.516 |
| Na | 137.00 (136.00,139.00) | 137.00 (136.00,139.00) | 138.00 (136.00,139.00) | 0.857 |
| Cr | 65.00 (54.00,77.00) | 64.00 (54.00,76.00) | 67.00 (56.00,81.00) | 0.231 |
| HB | 126.00 (113.00,136.00) | 126.00 (114.00,137.00) | 125.00 (107.50,133.00) | 0.161 |
| RBC | 4.00 (3.00,4.00) | 4.00 (3.00,4.00) | 4.00 (3.00,4.00) | 0.088 |
| WBC | 12.60 (10.20,15.50) | 12.29 (10.20,14.90) | 13.60 (10.05,17.80) | 0.131 |
| HCT | 39.20 (36.70,42.30) | 39.30 (36.73,42.38) | 39.00 (36.20,41.60) | 0.461 |
| GLU | 3.92 (3.38,4.72) | 3.84 (3.34,4.53) | 4.50 (3.63,6.24) | 0.004 |
| SBP | 148.00 (133.00,164.00) | 145.00 (133.00,162.00) | 157.00 (142.50,174.00) | 0.017 |
| DBP | 87.00 (78.00,97.00) | 87.00 (78.00,96.00) | 89.00 (80.00,97.50) | 0.333 |
| INR | 1.10 (1.10,1.30) | 1.10 (1.10,1.20) | 1.30 (1.10,1.50) | <0.001 |
| PLT | 234.00 (215.00,255.00) | 238.00 (218.00,256.00) | 220.00 (214.00,233.50) | 0.001 |
| Gender |  |  |  | 0.003 |
| Female | 164 (57.14%) | 130 (53.28%) | 34 (79.07%) |  |
| Male | 123 (42.86%) | 114 (46.72%) | 9 (20.93%) |  |
| Hydrocephalus |  |  |  | 0.003 |
| No | 216 (75.26%) | 192 (78.69%) | 24 (55.81%) |  |
| Yes | 71 (24.74%) | 52 (21.31%) | 19 (44.19%) |  |
| Cerebral infarction |  |  |  | 0.011 |
| No | 226 (89.33%) | 193 (91.90%) | 33 (76.74%) |  |
| Yes | 27 (10.67%) | 17 (8.10%) | 10 (23.26%) |  |
| Drainage |  |  |  | 1 |
| No | 165 (65.22%) | 137 (65.24%) | 28 (65.12%) |  |
| Yes | 88 (34.78%) | 73 (34.76%) | 15 (34.88%) |  |
| Antiplatelet drugs |  |  |  | 0.101 |
| No | 139 (54.94%) | 110 (52.38%) | 29 (67.44%) |  |
| Yes | 114 (45.06%) | 100 (47.62%) | 14 (32.56%) |  |
| Nimodipine |  |  |  | 0.069 |
| No | 124 (49.01%) | 97 (46.19%) | 27 (62.79%) |  |
| Yes | 129 (50.99%) | 113 (53.81%) | 16 (37.21%) |  |
| Rivaroxaban |  |  |  | 0.128 |
| No | 216 (85.38%) | 183 (87.14%) | 33 (76.74%) |  |
| Yes | 37 (14.62%) | 27 (12.86%) | 10 (23.26%) |  |
| Diabetes |  |  |  | 0.004 |
| No | 222 (85.06%) | 192 (88.07%) | 30 (69.77%) |  |
| Yes | 39 (14.94%) | 26 (11.93%) | 13 (30.23%) |  |
| Smoking |  |  |  | 0.605 |
| No | 205 (78.54%) | 173 (79.36%) | 32 (74.42%) |  |
| Yes | 56 (21.46%) | 45 (20.64%) | 11 (25.58%) |  |
| Hypertension |  |  |  | 0.888 |
| No | 127 (48.66%) | 107 (49.08%) | 20 (46.51%) |  |
| Yes | 134 (51.34%) | 111 (50.92%) | 23 (53.49%) |  |
| Pneumonia |  |  |  | 0.888 |
| No | 127 (48.66%) | 107 (49.08%) | 20 (46.51%) |  |
| Yes | 134 (51.34%) | 111 (50.92%) | 23 (53.49%) |  |
| Meningitis |  |  |  | 0.084 |
| No | 225 (86.21%) | 192 (88.07%) | 33 (76.74%) |  |
| Yes | 36 (13.79%) | 26 (11.93%) | 10 (23.26%) |  |

Abbreviations: First GCS, First Glasgow Coma Scale; CL, Chlorine; Ca, Calcium; BUN, Blood Urea Nitrogen; K, Potassium; Na, Sodium; Cr, Creatinine; HB, Hemoglobin; RBC, Red Blood Cells; WBC, White Blood Cell; HCT, Hematocrit; GLU, Glucose; SBP, Systolic Blood Pressure; DBP, Diastolic Blood Pressure; INR, International Normalized Ratio; PLT, Platelets.

Note: Significant differences (P < 0.05) were observed between the two groups in First GCS, GLU, SBP, INR, PLT, sex, incidence of hydrocephalus, occurrence of cerebral infarction, nimodipine use, and diabetes prevalence.

Table S2 Performance Evaluation Table for 10-fold Multiple Imputation on the Training Set

|  | **null.deviance** | **df.null** | **logLik** | **AIC** | **BIC** | **deviance** | **df.residual** | **nobs** |
| --- | --- | --- | --- | --- | --- | --- | --- | --- |
| 1 | 242 | 286 | -71.9 | 204 | 314 | 144 | 257 | 287 |
| 2 | 242 | 286 | -71 | 202 | 312 | 142 | 257 | 287 |
| 3 | 242 | 286 | -71.9 | 204 | 314 | 144 | 257 | 287 |
| 4 | 242 | 286 | -69.3 | 199 | 308 | 139 | 257 | 287 |
| 5 | 242 | 286 | -71.9 | 204 | 314 | 144 | 257 | 287 |
| 6 | 242 | 286 | -70.3 | 201 | 310 | 141 | 257 | 287 |
| 7 | 242 | 286 | -71.2 | 202 | 312 | 142 | 257 | 287 |
| 8 | 242 | 286 | -70.6 | 201 | 311 | 141 | 257 | 287 |
| **9** | **242** | **286** | **-69** | **198** | **308** | **138** | **257** | **287** |
| 10 | 242 | 286 | -70.7 | 201 | 311 | 141 | 257 | 287 |

Note: The bolded row corresponds to the 9th multiple imputation with the smallest AIC and BIC, which was ultimately selected as the final imputed dataset.

Table S3 Table of Raw Baseline Characteristics for the Validation Set

|  | **All patients** | **Alive** | **Dead** | **P** |
| --- | --- | --- | --- | --- |
|  | N=621 | N=501 | N=120 |  |
| Age | 62.00 (51.00,75.00) | 61.00 (51.00,73.00) | 69.50 (53.50,79.50) | 0.001 |
| First_gcs | 8.00 (3.00,14.00) | 12.00 (6.00,14.00) | 3.00 (3.00,4.00) | <0.001 |
| Cl | 104.00 (101.00,107.00) | 104.00 (102.00,107.00) | 104.00 (100.00,109.00) | 0.846 |
| Ca | 2.17 (2.05,2.27) | 2.17 (2.05,2.27) | 2.10 (2.00,2.30) | 0.376 |
| BUN | 5.00 (3.57,6.78) | 4.64 (3.57,6.07) | 6.43 (4.64,9.73) | <0.001 |
| K | 3.90 (3.60,4.30) | 3.90 (3.60,4.20) | 4.10 (3.70,4.60) | 0.001 |
| Na | 139.00 (137.00,141.00) | 139.00 (137.00,141.00) | 140.00 (137.00,143.00) | 0.060 |
| Cr | 70.72 (61.88,88.40) | 70.72 (53.04,79.56) | 97.24 (70.72,123.76) | <0.001 |
| HB | 122.00 (110.00,134.00) | 123.00 (112.00,134.00) | 120.00 (101.00,133.50) | 0.057 |
| RBC | 4.06 (3.67,4.45) | 4.08 (3.70,4.45) | 3.94 (3.38,4.43) | 0.017 |
| WBC | 11.00 (8.70,14.00) | 10.50 (8.50,13.50) | 13.10 (10.25,16.05) | <0.001 |
| HCT | 37.10 (33.60,40.30) | 37.20 (33.90,40.30) | 36.10 (31.20,40.30) | 0.108 |
| GLU | 7.11 (5.94,8.56) | 6.89 (5.83,8.22) | 8.00 (6.83,11.01) | <0.001 |
| SBP | 131.00 (116.00,145.00) | 131.00 (118.00,145.00) | 128.00 (111.00,147.50) | 0.220 |
| DBP | 72.00 (62.00,82.00) | 72.00 (62.00,81.00) | 72.00 (61.50,83.50) | 0.758 |
| INR | 1.10 (1.10,1.20) | 1.10 (1.10,1.20) | 1.20 (1.10,1.30) | <0.001 |
| PLT | 210.00 (171.75,259.00) | 215.00 (178.00,260.00) | 196.00 (150.00,253.50) | 0.008 |
| Gender: |  |  |  | 0.020 |
| 0 | 366 (58.94%) | 307 (61.28%) | 59 (49.17%) |  |
| 1 | 255 (41.06%) | 194 (38.72%) | 61 (50.83%) |  |
| Hydrocephalus: |  |  |  | 0.008 |
| 0 | 596 (95.97%) | 476 (95.01%) | 120 (100.00%) |  |
| 1 | 25 (4.03%) | 25 (4.99%) | 0 (0.00%) |  |
| Cerebral_infarction: |  |  |  | 0.825 |
| 0 | 514 (82.77%) | 416 (83.03%) | 98 (81.67%) |  |
| 1 | 107 (17.23%) | 85 (16.97%) | 22 (18.33%) |  |
| Drainage: |  |  |  | 1.000 |
| 0 | 420 (67.63%) | 339 (67.66%) | 81 (67.50%) |  |
| 1 | 201 (32.37%) | 162 (32.34%) | 39 (32.50%) |  |
| Antiplatelet_drugs: |  |  |  | <0.001 |
| 0 | 426 (68.60%) | 327 (65.27%) | 99 (82.50%) |  |
| 1 | 195 (31.40%) | 174 (34.73%) | 21 (17.50%) |  |
| Nimodipine: |  |  |  | <0.001 |
| 0 | 277 (44.61%) | 198 (39.52%) | 79 (65.83%) |  |
| 1 | 344 (55.39%) | 303 (60.48%) | 41 (34.17%) |  |
| Rivaroxaban: |  |  |  | 0.349 |
| 0 | 619 (99.68%) | 500 (99.80%) | 119 (99.17%) |  |
| 1 | 2 (0.32%) | 1 (0.20%) | 1 (0.83%) |  |
| Diabetes: |  |  |  | 0.026 |
| 0 | 516 (83.09%) | 425 (84.83%) | 91 (75.83%) |  |
| 1 | 105 (16.91%) | 76 (15.17%) | 29 (24.17%) |  |
| Smoking: |  |  |  | 0.345 |
| 0 | 604 (97.26%) | 489 (97.60%) | 115 (95.83%) |  |
| 1 | 17 (2.74%) | 12 (2.40%) | 5 (4.17%) |  |
| Hypertension: |  |  |  | 0.063 |
| 0 | 302 (48.63%) | 234 (46.71%) | 68 (56.67%) |  |
| 1 | 319 (51.37%) | 267 (53.29%) | 52 (43.33%) |  |
| Pneumonia: |  |  |  | <0.001 |
| 0 | 446 (71.82%) | 378 (75.45%) | 68 (56.67%) |  |
| 1 | 175 (28.18%) | 123 (24.55%) | 52 (43.33%) |  |
| Meningitis: |  |  |  | 0.222 |
| 0 | 611 (98.39%) | 491 (98.00%) | 120 (100.00%) |  |
| 1 | 10 (1.61%) | 10 (2.00%) | 0 (0.00%) |  |

Abbreviations: First GCS, First Glasgow Coma Scale; CL, Chlorine; Ca, Calcium; BUN, Blood Urea Nitrogen; K, Potassium; Na, Sodium; Cr, Creatinine; HB, Hemoglobin; RBC, Red Blood Cells; WBC, White Blood Cell; HCT, Hematocrit; GLU, Glucose; SBP, Systolic Blood Pressure; DBP, Diastolic Blood Pressure; INR, International Normalized Ratio; PLT, Platelets.

Note: Significant differences (P < 0.05) were observed between the two groups in First GCS, GLU, SBP, INR, PLT, sex, incidence of hydrocephalus, occurrence of cerebral infarction, nimodipine use, and diabetes prevalence.

Table S4 **Performance Evaluation Table for 10-fold Multiple Imputation on the Validation Set**

|  | **null.deviance** | **df.null** | **logLik** | **AIC** | **BIC** | **deviance** | **df.residual** | **nobs** |
| --- | --- | --- | --- | --- | --- | --- | --- | --- |
| **1** | **610** | **620** | **-163** | **386** | **519** | **326** | **591** | **621** |
| 2 | 610 | 620 | -165 | 389 | 522 | 329 | 591 | 621 |
| 3 | 610 | 620 | -164 | 388 | 521 | 328 | 591 | 621 |
| 4 | 610 | 620 | -165 | 391 | 524 | 331 | 591 | 621 |
| 5 | 610 | 620 | -167 | 394 | 526 | 334 | 591 | 621 |
| 6 | 610 | 620 | -165 | 390 | 523 | 330 | 591 | 621 |
| 7 | 610 | 620 | -164 | 388 | 521 | 328 | 591 | 621 |
| 8 | 610 | 620 | -165 | 390 | 523 | 330 | 591 | 621 |
| 9 | 610 | 620 | -166 | 391 | 524 | 331 | 591 | 621 |
| 10 | 610 | 620 | -167 | 394 | 527 | 334 | 591 | 621 |

Note: The bolded row corresponds to the 1th multiple imputation with the smallest AIC and BIC, which was ultimately selected as the final imputed dataset.
